# Supplementary material for: Remote Physical Activity Monitoring in Neurological Disease: A Systematic Review
Source: PubMed Central journal article supplement (PMC4849800; doi:10.1371/journal.pone.0154335), 2016-04-28
Supplement: pone.0154335.s003.pdf [file pone.0154335.s003.pdf]

**Table e-2: Summary Of Common Monitors Used In Studies Monitoring Physical Activity For  $\geq 24$  Hours.**

| <b>Name</b>                                  | <b>Manufacturer</b>                   | <b>Acceleration directions detected</b>           | <b>Device Dimensions (cm)</b> | <b>Placement</b>       | <b>Average Cost*</b>                | <b>Main Outcomes measured</b>                                           | <b>Comments</b>                                   |
|----------------------------------------------|---------------------------------------|---------------------------------------------------|-------------------------------|------------------------|-------------------------------------|-------------------------------------------------------------------------|---------------------------------------------------|
| <b>ActiGraph Model 7164</b><br>(a) $\lambda$ | ActiGraph LLC<br>Pensacola, FL        | 1 (uniaxial) **                                   | 5.1 x 4.1 x 1.5<br>(45.5g)    | Hip, wrist<br>or ankle | \$225-299<br><br>Software<br>\$1495 | Activity count, step count,<br>EE, activity intensity level             | > Placement on R or<br>non-dom./unaffected<br>hip |
| <b>ActiGraph Model GT3X</b><br>(a) $\lambda$ | ActiGraph LLC<br>Pensacola, FL        | 3 (triaxial) **                                   | 4.6 x 3.3 x 1.5<br>(19g)      | Hip, wrist<br>or ankle | \$225-299<br><br>Software<br>\$1495 | Activity count, step count,<br>EE, activity intensity level             | > Placement on R or<br>non-dom./unaffected<br>hip |
| <b>StepWatch Activity Monitor (SAM)</b>      | Modus Health<br>Inc, Washington<br>DC | Microprocessor-<br>controlled activity<br>monitor | 6.5 x 5.0 x 1.5<br>(65g)      | Ankle                  | \$525<br><br>Software               | Step count, active vs<br>inactive minutes, step gait<br>characteristics | Greater accuracy for<br>slow walking speeds.      |

|                         |                                            |                                                 |                              |                      |                     |                                                         |                                   |
|-------------------------|--------------------------------------------|-------------------------------------------------|------------------------------|----------------------|---------------------|---------------------------------------------------------|-----------------------------------|
| (b)λ                    |                                            |                                                 |                              |                      | \$1470              |                                                         |                                   |
| <b>StepWatch 3</b>      | Orthocare                                  | Microprocessor-                                 | 6.5 x 5.0 x 1.5              | Ankle                | \$525               | Step count, active vs                                   | Greater accuracy for              |
| <b>Activity Monitor</b> | Innovations,<br>Oklahoma City,<br>Oklahoma | controlled activity<br>monitor                  | (65g)                        |                      | Software            | inactive minutes, step gait<br>characteristics          | slow walking speeds.              |
|                         |                                            |                                                 |                              |                      | \$1470              |                                                         |                                   |
| <b>Yamax SW-200</b>     | Yamax-                                     | Pedometer – spring                              | 5.0 x 3.8 x 1.4              | Clip to              | \$13 -19.50         | Step count                                              |                                   |
| <b>digiwalker Step</b>  | Digiwalker,                                | loaded lever arm                                | (21g)                        | multiple             |                     |                                                         | —                                 |
| <b>Pedometer</b>        | Warminster, PA                             |                                                 |                              | locations            |                     |                                                         |                                   |
| (c)                     |                                            |                                                 |                              |                      |                     |                                                         |                                   |
| <b>TriTrac RT3</b>      | StayHealthy Inc.,<br>Monrovia, CA,<br>USA  | 3 (triaxial) **                                 | 10.8 x 6.8 x 3.3<br>(170.4g) | Waist                | ~\$500              | Net vector magnitude<br>counts, EE, step count          | > Placement on<br>posterior waist |
| (d)                     |                                            |                                                 |                              |                      |                     |                                                         |                                   |
| <b>DynaPort Hybrid</b>  | McRoberts, The<br>Hague,                   | 3 (triaxial) Accel – 3<br>(triaxial) gyroscope. | 87 x 45 x 14<br>(74g)        | Lower<br>back (level | Hardware<br>EUR 695 | Physical activity (steps,<br>intensity & postures), EE, | —                                 |
| (e)                     |                                            |                                                 |                              |                      |                     |                                                         |                                   |

|                                                                                                                                                                |                                                                                      |                                               |                                       |                       |                      |                                                                                              |
|----------------------------------------------------------------------------------------------------------------------------------------------------------------|--------------------------------------------------------------------------------------|-----------------------------------------------|---------------------------------------|-----------------------|----------------------|----------------------------------------------------------------------------------------------|
|                                                                                                                                                                | Netherlands                                                                          |                                               |                                       | of L4-5)              | Module –<br>EUR 200^ | sleep                                                                                        |
| <b>Shimmer3 IMU</b><br>(f)                                                                                                                                     | Shimmer<br>Boston<br>MA, USA                                                         | Accelerometer,<br>gyroscope &<br>magnetometer | 51 x 34 x 14<br>(23.6g)               | Multiple<br>locations | ~\$558               | > worn on the wrist                                                                          |
| <b>Intelligent Device</b><br><b>for Energy</b><br><b>Expenditure and</b><br><b>Activity</b><br>(g)                                                             | MiniSun<br>Company, 935<br>E. MillCreek<br>Dr., Fresno,<br>California,<br>93720, USA | 1 recorder and 5 sets<br>of sensors           | 1cm <sup>2</sup> (5 sensors)<br>(58g) | Multiple<br>locations |                      | Activity counts (walking,<br>stairs, transitions),<br>Time spent: on feet vs not<br>on feet. |
| <b>Abbreviations:</b> EE = energy expenditure, > = mostly, R = right, L = left, non-dom = non-dominant, Accel = Accelerometer.                                 |                                                                                      |                                               |                                       |                       |                      |                                                                                              |
| λ Approved by the Food and Drug Administration (FDA) (StepWatch = marketing clearance as a class II device)                                                    |                                                                                      |                                               |                                       |                       |                      |                                                                                              |
| * Cost data was obtained from the manufacturer website as well as major retail sites (www.amazon.com when relevant), date accessed 06.14.2015.                 |                                                                                      |                                               |                                       |                       |                      |                                                                                              |
| ** Using a piezoelectric bender element or solid-state accelerometer that produces an electric signal proportionate to the force acting on it during movement. |                                                                                      |                                               |                                       |                       |                      |                                                                                              |
| ^ 1 module = EUR 200, 2 modules = EUR 300, 3 modules = EUR 375 and 4 modules = EUR 400                                                                         |                                                                                      |                                               |                                       |                       |                      |                                                                                              |

Websites: a) <http://www.actigraphcorp.com>, b) <https://modushealth.com>, (c) <http://www.yamax-digiwalker.com>, (d) <https://www.stayhealthy.com>, (e) <https://www.mcroberts.nl/>, (f) <http://www.shimmersensing.com/shop/consensus-base6-imu-development-kits>

NB: Common = used in  $\geq 2$  studies
